# Supplementary material for: A Combination of Alectinib and DNA-Demethylating Agents Synergistically Inhibits Anaplastic-Lymphoma-Kinase-Positive Anaplastic Large-Cell Lymphoma Cell Proliferation
Source: MDPI journal article supplement (doi:10.3390/cancers15205089), 2023-10-21

Figure 2 b\_Karpas299

Membrane(stained with ponceau-S)

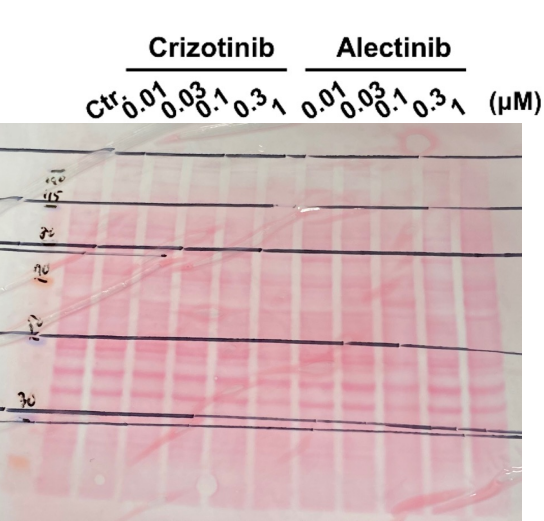

pSTAT3

※Signal intensity

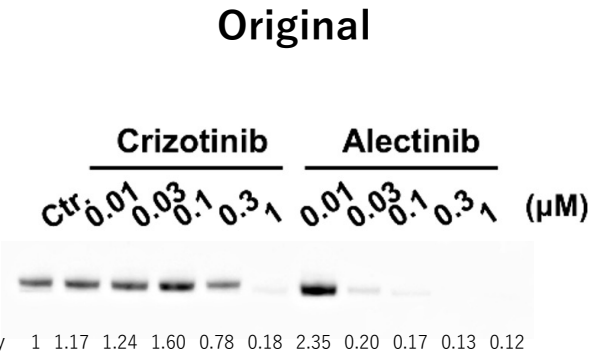

Marged with marker

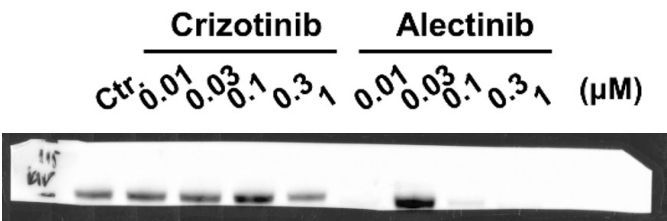

Figure 2 b\_Karpas299

Membrane(stained with ponceau-S)

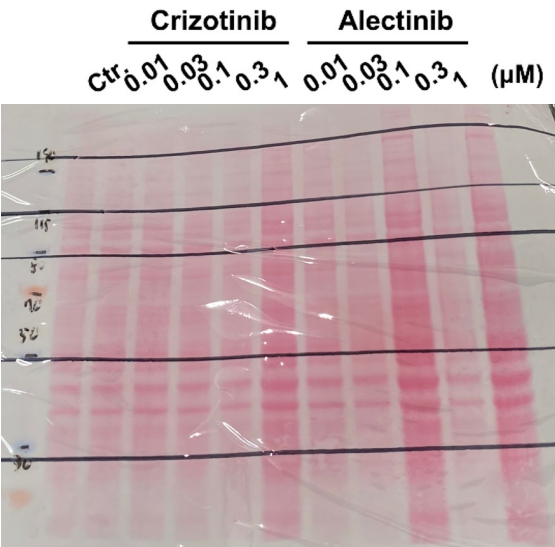

STAT3

Tubulin

Original

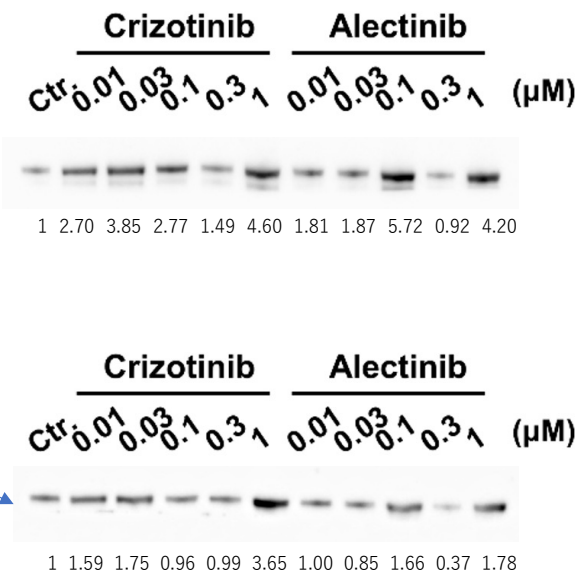

Marged with marker

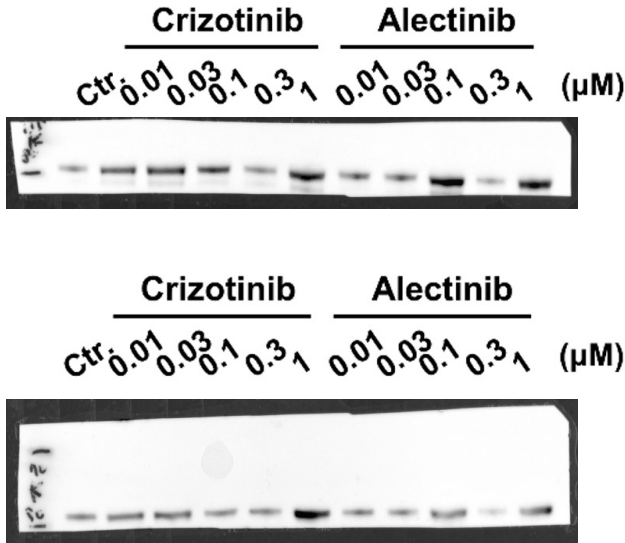

Figure 2 b\_SR786

Membrane(stained with ponceau-S)

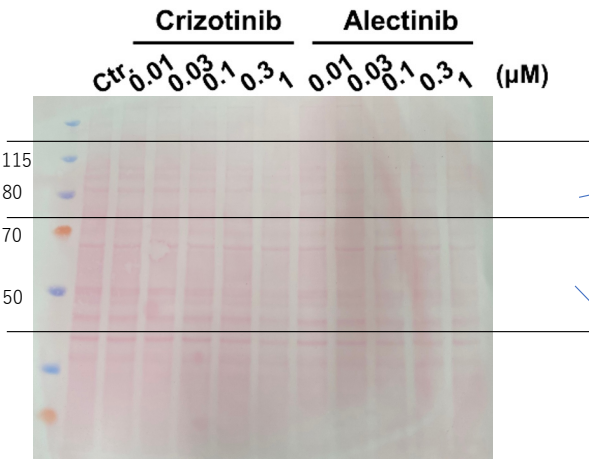

pSTAT3

Tubulin

Original

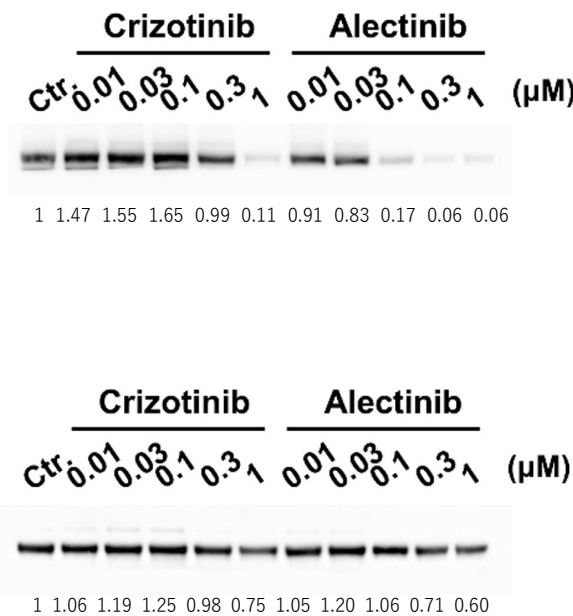

Marged with marker

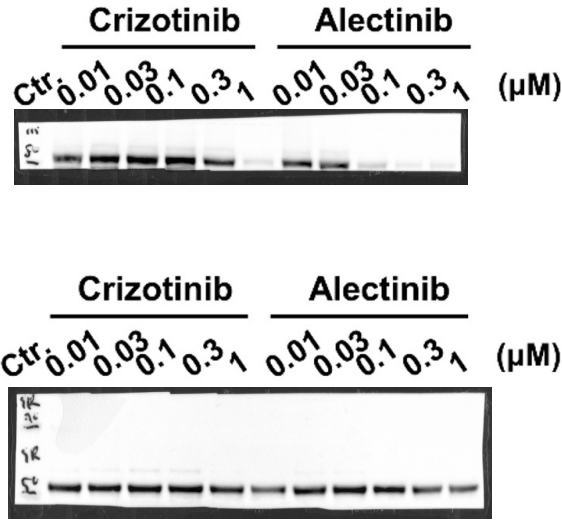

Figure 2 b\_SR786

Membrane(stained with ponceau-S)

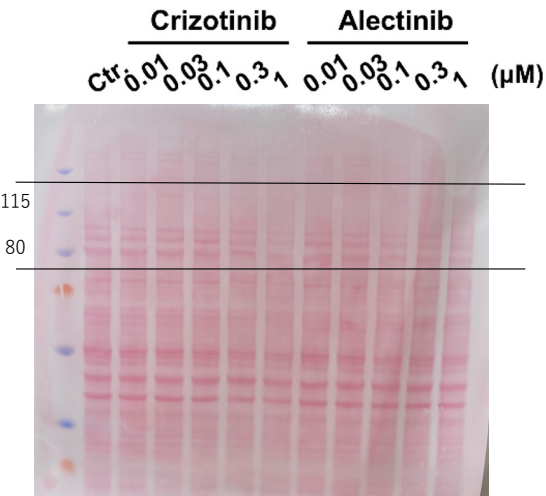

STAT3

Original

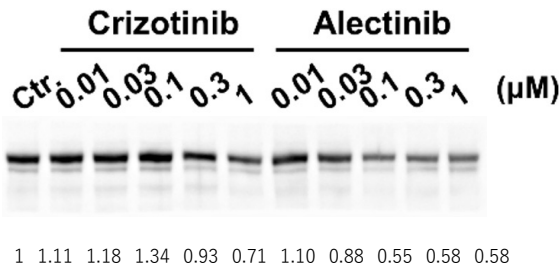

Marged with marker

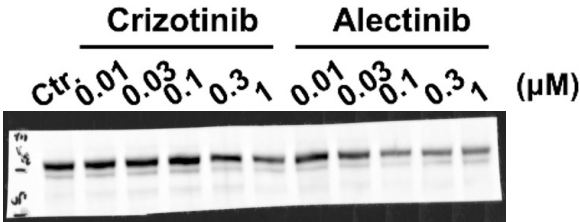

Figure 4 b

Membrane(stained with ponceau-S)

|      |   |      |   |      |      |     |      |            |
|------|---|------|---|------|------|-----|------|------------|
| Alec | - | 0.01 | - | 0.01 | 0.02 | -   | 0.02 | ( $\mu$ M) |
| AZA  | - | -    | 1 | 1    | -    | -   | -    | ( $\mu$ M) |
| OR21 | - | -    | - | -    | -    | 0.3 | 0.3  | ( $\mu$ M) |

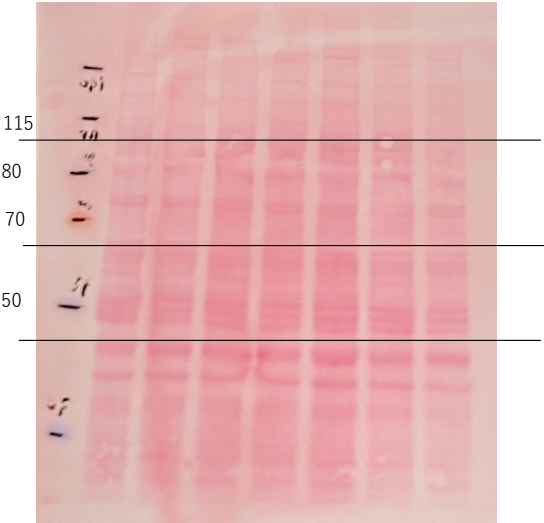

pSTAT3

Tubulin

Original

|      |   |      |   |      |      |     |      |            |
|------|---|------|---|------|------|-----|------|------------|
| Alec | - | 0.01 | - | 0.01 | 0.02 | -   | 0.02 | ( $\mu$ M) |
| AZA  | - | -    | 1 | 1    | -    | -   | -    | ( $\mu$ M) |
| OR21 | - | -    | - | -    | -    | 0.3 | 0.3  | ( $\mu$ M) |

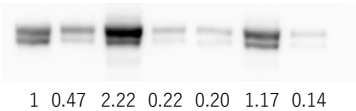

|      |   |      |   |      |      |     |      |            |
|------|---|------|---|------|------|-----|------|------------|
| Alec | - | 0.01 | - | 0.01 | 0.02 | -   | 0.02 | ( $\mu$ M) |
| AZA  | - | -    | 1 | 1    | -    | -   | -    | ( $\mu$ M) |
| OR21 | - | -    | - | -    | -    | 0.3 | 0.3  | ( $\mu$ M) |

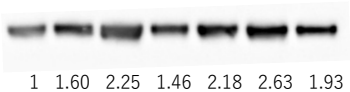

Marged with marker

|      |   |      |   |      |      |     |      |            |
|------|---|------|---|------|------|-----|------|------------|
| Alec | - | 0.01 | - | 0.01 | 0.02 | -   | 0.02 | ( $\mu$ M) |
| AZA  | - | -    | 1 | 1    | -    | -   | -    | ( $\mu$ M) |
| OR21 | - | -    | - | -    | -    | 0.3 | 0.3  | ( $\mu$ M) |

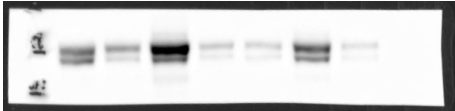

|      |   |      |   |      |      |     |      |            |
|------|---|------|---|------|------|-----|------|------------|
| Alec | - | 0.01 | - | 0.01 | 0.02 | -   | 0.02 | ( $\mu$ M) |
| AZA  | - | -    | 1 | 1    | -    | -   | -    | ( $\mu$ M) |
| OR21 | - | -    | - | -    | -    | 0.3 | 0.3  | ( $\mu$ M) |

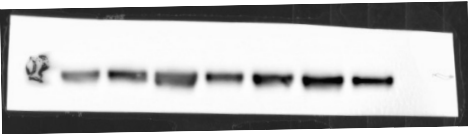

Figure 4 b

Membrane(stained with ponceau-S)

Alec - 0.01 - 0.01 0.02 - 0.02 (μM)  
AZA - - 1 1 - - - (μM)  
OR21 - - - - - 0.3 0.3 (μM)

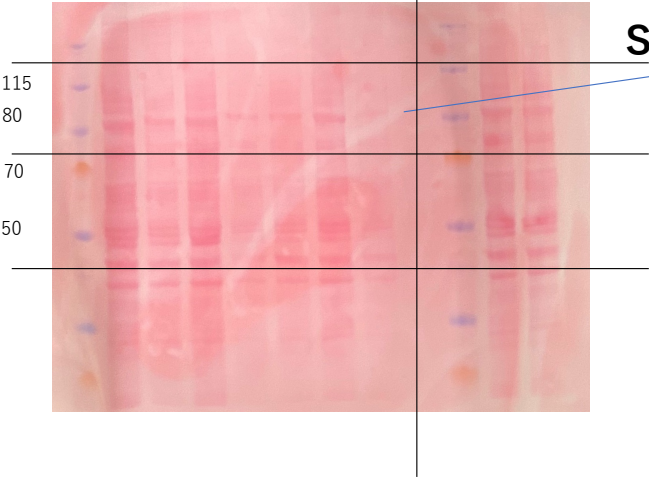

STAT3

Original

Alec - 0.01 - 0.01 0.02 - 0.02 (μM)  
AZA - - 1 1 - - - (μM)  
OR21 - - - - - 0.3 0.3 (μM)

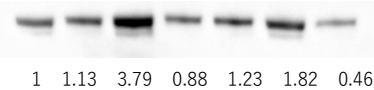

Supplement: s1 [file cancers-2402547-File S1.pdf › cancers-2402547-File S1.pdf]
