# Supplementary material for: A Combination of Alectinib and DNA-Demethylating Agents Synergistically Inhibits Anaplastic-Lymphoma-Kinase-Positive Anaplastic Large-Cell Lymphoma Cell Proliferation
Source: MDPI journal article supplement (doi:10.3390/cancers15205089), 2023-10-21
Supplement: s1 [file cancers-2402547-supplementary figures.pdf › cancers-2402547-supplementary figures.pdf]

## Supplementary information

# A Combination of Alectinib and DNA-Demethylating Agents Synergistically Inhibits Anaplastic-Lymphoma-Kinase-Positive Anaplastic Large-Cell Lymphoma Cell Proliferation

Kazunori Kawasoe <sup>1,2</sup>, Tatsuro Watanabe <sup>1,\*</sup>, Nao Yoshida-Sakai <sup>1,2</sup>, Yuta Yamamoto <sup>1,2</sup>, Yuki Kurahashi <sup>1,3</sup>, Keisuke Kidoguchi <sup>1,2</sup>, Hiroshi Ureshino <sup>1,2</sup>, Kazuharu Kamachi <sup>1,2</sup>, Yuki Fukuda-Kurahashi <sup>1,3</sup> and Shinya Kimura <sup>1,2,\*</sup>

<sup>1</sup> Department of Drug Discovery and Biomedical Sciences, Faculty of Medicine, Saga University, Saga 849-8501, Japan

<sup>2</sup> Division of Hematology, Respiratory Medicine and Oncology, Department of Internal Medicine, Faculty of Medicine, Saga University, Saga 849-8501, Japan

<sup>3</sup> OHARA Pharmaceutical Co., Ltd., Koka 520-3403, Japan

\* Correspondence: sn6538@cc.saga-u.ac.jp (T.W.); shkimu@cc.saga-u.ac.jp (S.K.);

|                           |                              |
|---------------------------|------------------------------|
| <b>Table of contents:</b> | Supplementary methods        |
|                           | Supplementary Figures 1 to 6 |
|                           | Supplementary references     |

## **Supplementary methods**

### **Quantitative real-time PCR**

RNA extraction, synthesis of complementary DNA, and quantification of *SFRP5*, *CEL*, *GPR171*, and *ACTB* gene expression were performed using the TaqMan Gene Expression Master Mix (Applied Biosystems), as described previously<sup>1</sup>. Expression of *ACTB* was used as an internal control.

### **Cluster analysis**

The global methylation dataset of ALCL patients was obtained from Gene Expression Omnibus (GSE66881)<sup>2</sup>. The data originated from: 1) tumor tissue samples from ALK<sup>+</sup> and ALK<sup>-</sup> ALCL patients (a tumor content > 90% was histopathologically verified); and 2) blood samples from five healthy individuals, from which CD3<sup>+</sup> T cells were isolated to generate control data. The methylation data were generated using Illumina Infinium HumanMethylation450 BeadChip. The methylation level of a CpG site was represented by a b value, which ranged from 0 (completely unmethylated) to 1 (completely methylated). Unsupervised hierarchical clustering analysis was performed using the Heatplus package of R v3.4.4., as described previously<sup>1,3</sup>.

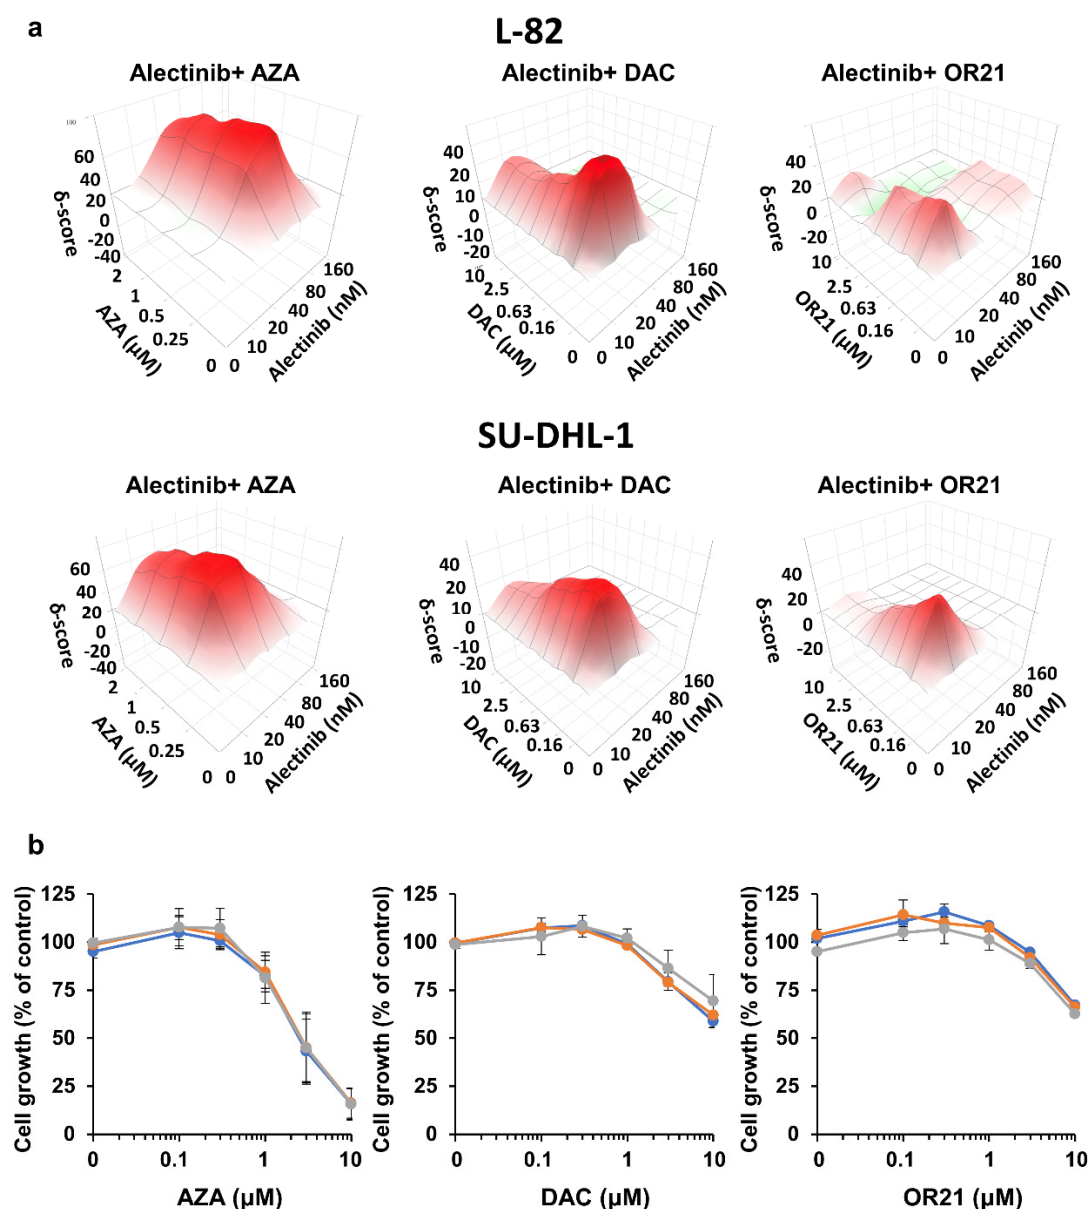

**Supplementary Figure S1. Synergistic inhibition of cell proliferation induced by the combination of alectinib and DNA demethylating agents.** **a.** ALK+ ALCL cell lines were treated with each compound alone or in combination for 4 days. Cell proliferation was determined using the CCK-8 assay and the synergy scores and maps were generated using the SynergyFinder web-application. **b.** Human primary hepatocytes were treated with different concentrations of DNA demethylating agents (AZA, DAC, or OR21) with/without 100 nM crizotinib or alectinib for 4 days (DNA demethylating agent alone: blue, combination with 100 nM crizotinib: orange, combination with 100 nM alectinib: grey). Cell proliferation was determined using the CCK-8 assay and the proliferation value of untreated cells was set at 100%. The results are expressed as the mean  $\pm$  SD from three independent experiments.

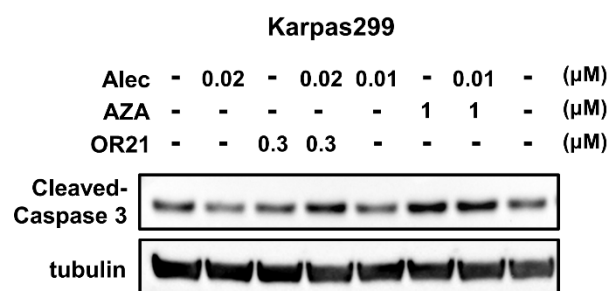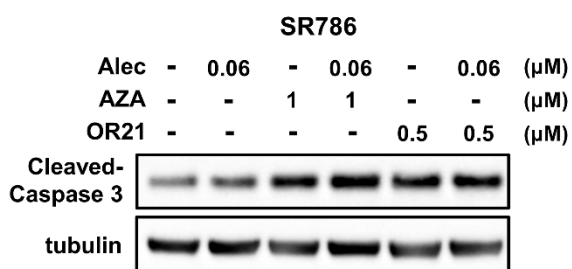

**Supplementary Figure S2. Induction of cleaved caspase-3 protein by the combination of alectinib and DNA demethylating agents.** Karpas299 and SR-786 cells were treated with each compound alone or in combination for 4 days. Immunoblots showing the amount of cleaved caspase 3 in cells exposed to the indicated treatment conditions.

a

|                | Ctr. | Alec<br>OR21 | Alec<br>OR21 | Alec<br>AZA | Alec<br>AZA |
|----------------|------|--------------|--------------|-------------|-------------|
| <i>TNFRSF8</i> | 1.00 | 0.61         | 0.94 0.41    | 1.05        | 1.90 1.82   |
| <i>IL10</i>    | 1.00 | 1.48         | 0.03 0.02    | 1.98        | 0.24 0.21   |
| <i>CD274</i>   | 1.00 | 1.57         | 0.02 0.08    | 1.32        | 0.02 0.02   |
| <i>TGFB1</i>   | 1.00 | 1.20         | 1.13 0.91    | 1.28        | 1.07 1.12   |
| <i>VEGFA</i>   | 1.00 | 1.23         | 0.11 0.18    | 1.20        | 0.22 0.16   |
| <i>BCL2A1</i>  | 1.00 | 0.67         | 0.02 0.04    | 0.93        | 0.01 0.02   |
| <i>MCL1</i>    | 1.00 | 1.06         | 0.71 0.66    | 0.93        | 0.61 0.68   |
| <i>IL10RA</i>  | 1.00 | 1.50         | 15.36 6.50   | 1.57        | 6.07 6.36   |
| <i>PDGFRA</i>  | 1.00 | 0.88         | 0.00 0.04    | 1.15        | 0.38 0.23   |
| <i>PDGFRL</i>  | 1.00 | 0.74         | 0.08 0.30    | 1.08        | 0.09 0.10   |
| <i>IRF4</i>    | 1.00 | 0.58         | 3.50 0.66    | 0.86        | 3.40 2.72   |
| <i>CD276</i>   | 1.00 | 1.77         | 0.52 0.30    | 1.48        | 0.56 0.45   |
| <i>HIF1A</i>   | 1.00 | 1.78         | 0.58 0.46    | 1.49        | 0.59 0.48   |
| <i>MYC</i>     | 1.00 | 0.66         | 0.11 0.13    | 0.95        | 0.87 0.56   |
| <i>BCL2L1</i>  | 1.00 | 1.02         | 0.77 0.79    | 0.86        | 0.62 0.71   |
| <i>CCND1</i>   | 1.00 | 25.25        | 0.00 0.50    | 9.25        | 0.25 0.00   |
| <i>NOTCH1</i>  | 1.00 | 1.36         | 0.21 0.51    | 1.45        | 0.35 0.38   |

b

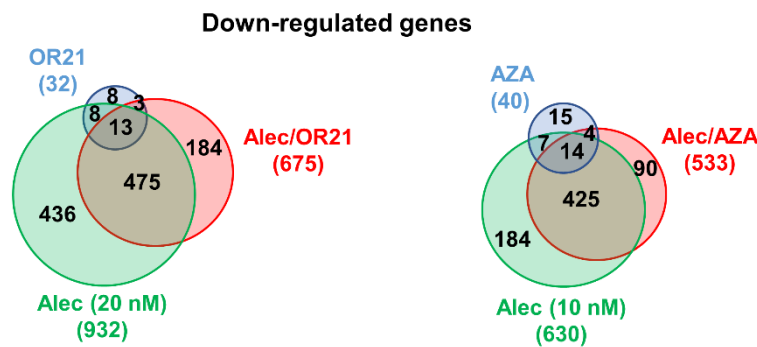

**Supplementary Figure S3. Changes in gene expression profiles induced by the combination of alectinib and DNA demethylating agents.** **a.** Karpas299 cells were treated with each compound alone or in combination for 3 days. Normalized expression levels (transcripts per million) of downstream target genes of ALK obtained from the analysis of RNA-seq data are shown as relative expression levels (compared to control in each gene). **b.** Venn diagrams show the number of down-regulated ( $\leq 0.2$  fold change) genes relative to the control in the transcriptome analysis.

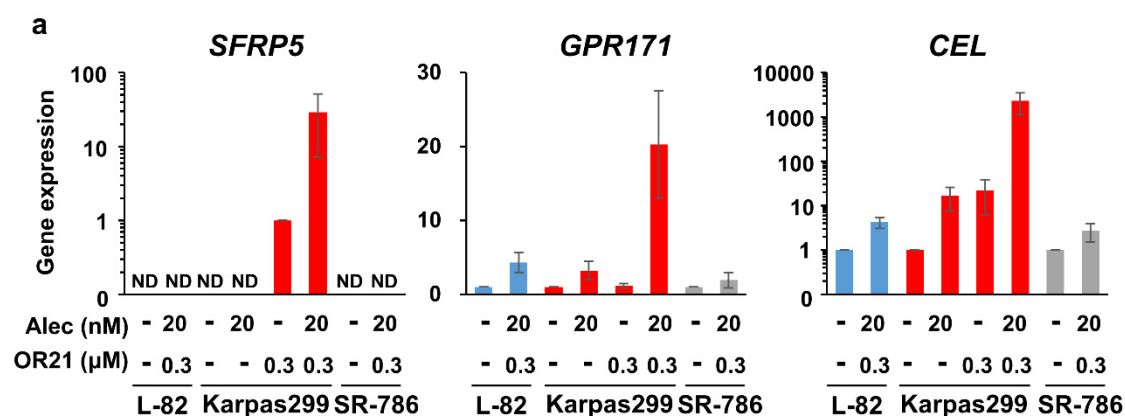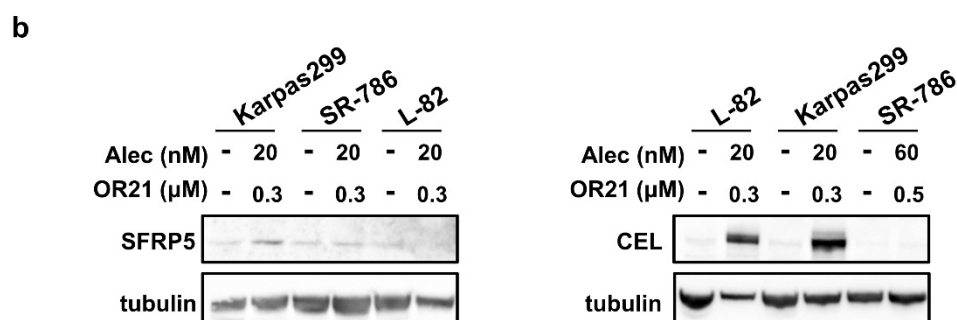

**Supplementary Figure S4. Up-regulation of *SFRP5*, *GPR150*, and *CEL* gene expression induced by the combination of alectinib and OR21.** ALCL cell lines were treated with each compound alone or in combination for 3 days. Gene expression levels of *SFRP5*, *GPR171*, and *CEL* was determined by real-time PCR. For the L-82 and SR-786 cell lines, relative gene expression is shown as a fold change relative to that of each of the untreated cells after normalization against *ACTB* gene expression levels. Since the *SFRP5* expression was not detected in untreated Karpas299 cells, relative gene expression is shown as a fold change relative to that in Karpas299 cells treated with OR21 alone. The data represent the averages of the results of more than three independent experiments. **b.** Immunoblots showing the amount of *SFRP5* and *CEL* in cells exposed to the indicated treatment conditions.

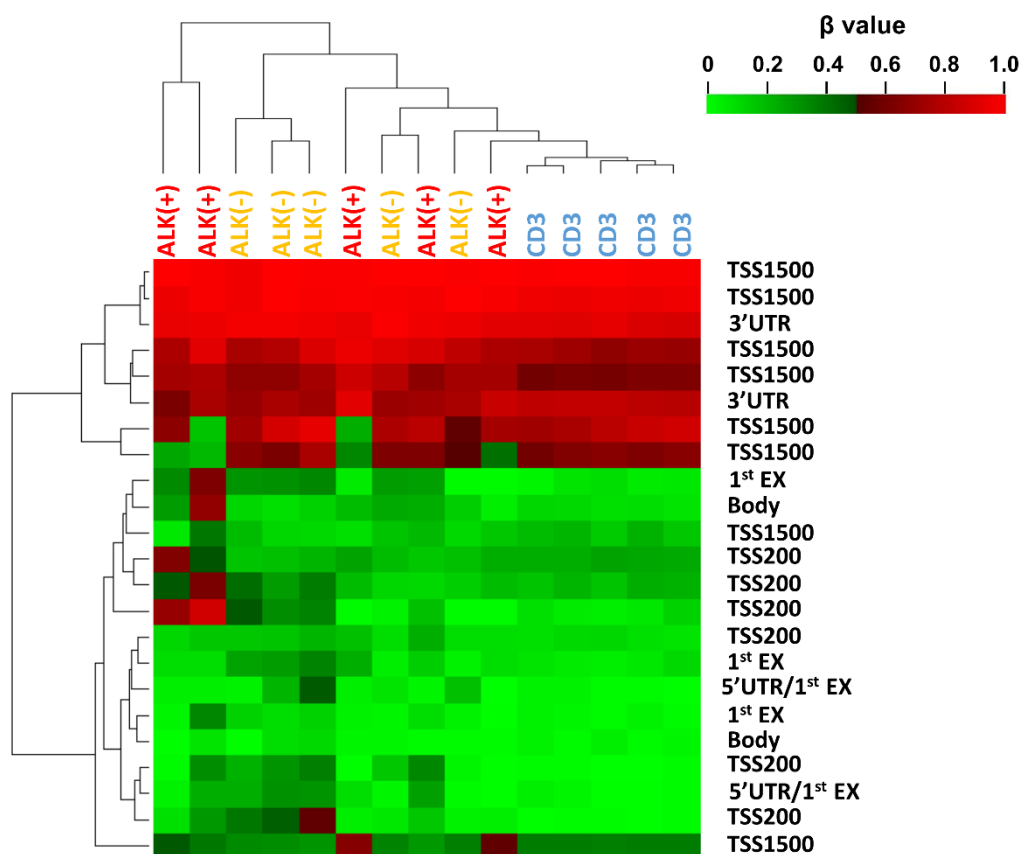

**Supplementary Figure S5. Promoter hypermethylation of *SFRP5* in ALCL cells.** Unsupervised hierarchical clustering analysis of the *SFRP5* gene methylation status in CD3<sup>+</sup> T cells isolated from the blood of healthy individuals (CD3) or in ALCL cells derived from the tumor tissues of patients with ALK<sup>+</sup> ALCL (ALK<sup>+</sup>) and ALK<sup>-</sup> ALCL (ALK<sup>-</sup>). The methylation dataset was obtained from the Gene Expression Omnibus (NCBI GSE66881). TSS: transcription start site; 1<sup>st</sup> EX: first exon; Body: gene body.

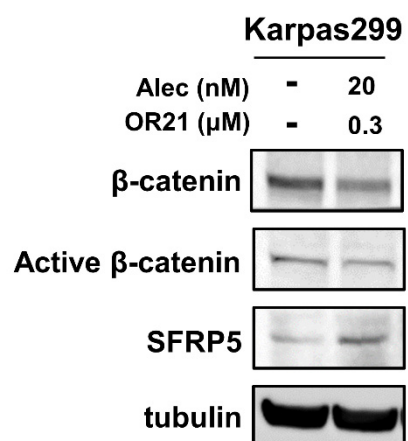

**Supplementary Figure S6. Reduction of β-catenin associated with induction of SFRP5 by the combination of alectinib and OR21.** Karpas299 cells were treated with OR21 and alectinib for 3 days. Immunoblots showing the amount of β-catenin, active β-catenin (non-phosphorylation at Ser45) and SFRP5 proteins.



### Supplementary references

1. Watanabe, T., *et al.* Targeting aberrant DNA hypermethylation as a driver of ATL leukemogenesis by using the new oral demethylating agent OR-2100. *Blood* **136**, 871-884 (2020).
2. Hassler, M.R., *et al.* Insights into the Pathogenesis of Anaplastic Large-Cell Lymphoma through Genome-wide DNA Methylation Profiling. *Cell reports* **17**, 596-608 (2016).
